# Supplementary material for: Application of Chaos Theory in the Assessment of Emotional Vulnerability and Emotion Dysregulation in Adults
Source: PubMed Central journal article supplement (PMC7071830; doi:10.3390/brainsci10020089), 2020-02-09
Supplement: brainsci-10-00089-s001.pdf [file brainsci-10-00089-s001.pdf]

# Supplementary Material: Application of Chaos Theory in the Assessment of Emotional Vulnerability and Emotion Dysregulation in Adults

Table S1. DERS Clusters Structure; R = REVERSE SCORING.

| Scoring | Nr   | Clusters structure                                                              |
|---------|------|---------------------------------------------------------------------------------|
|         |      | <b>NONACCEPTANCE</b>                                                            |
|         | I11. | When I'm upset, I become angry with myself for feeling that way.                |
|         | I12. | When I'm upset, I become embarrassed for feeling that way.                      |
|         | I21. | When I'm upset, I feel ashamed at myself for feeling that way.                  |
|         | I23. | When I'm upset, I feel like I am weak.                                          |
|         | I25. | When I'm upset, I feel guilty for feeling that way.                             |
|         | I29. | When I'm upset, I become irritated at myself for feeling that way.              |
|         |      | <b>GOALS</b>                                                                    |
|         | I13. | When I'm upset, I have difficulty getting work done.                            |
|         | I18. | When I'm upset, I have difficulty focusing on other things                      |
| R       | I20. | When I'm upset, I can still get things done.                                    |
|         | I26. | When I'm upset, I have difficulty concentrating.                                |
|         | I33. | When I'm upset, I have difficulty thinking about anything else.                 |
|         |      | <b>IMPULSE</b>                                                                  |
|         | I3.  | I experience my emotions as overwhelming and out of control.                    |
|         | I14. | When I'm upset, I become out of control.                                        |
|         | I19. | When I'm upset, I feel out of control.                                          |
| R       | I24. | When I'm upset, I feel like I can remain in control of my behaviors.            |
|         | I27. | When I'm upset, I have difficulty controlling my behaviors                      |
|         | I32. | When I'm upset, I lose control over my behavior.                                |
|         |      | <b>AWARENESS</b>                                                                |
| R       | I2.  | I pay attention to how I feel.                                                  |
| R       | I6.  | I am attentive to my feelings.                                                  |
| R       | I8.  | I care about what I am feeling                                                  |
| R       | I10. | When I'm upset, I acknowledge my emotions                                       |
| R       | I17. | When I'm upset, I believe that my feelings are valid and important.             |
| R       | I34. | When I'm upset I take time to figure out what I'm really feeling.               |
|         |      | <b>STRATEGIES</b>                                                               |
|         | I15. | When I'm upset, I believe that I will remain that way for a long time.          |
|         | I16. | When I'm upset, I believe that I will end up feeling very depressed.            |
| R       | I22. | When I'm upset, I know that I can find a way to eventually feel better          |
|         | I28. | When I'm upset, I believe there is nothing I can do to make myself feel better. |
|         | I30. | When I'm upset, I start to feel very bad about myself.                          |
|         | I31. | When I'm upset, I believe that wallowing in it is all I can do.                 |
|         | I35. | When I'm upset, it takes me a long time to feel better.                         |
|         | I36. | When I'm upset, my emotions feel overwhelming.                                  |
|         |      | <b>CLARITY</b>                                                                  |
| R       | I1.  | I am clear about my feelings.                                                   |
|         | I4.  | I have no idea how I am feeling.                                                |
|         | I5.  | I have difficulty making sense out of my feelings.                              |

|   |     |                                 |
|---|-----|---------------------------------|
| R | 17. | I know exactly how I am feeling |
|   | 19. | I am confused about how I feel. |

**Table S2.** Difficulties in Emotion Regulation Scale (DERS), Gratz & Roemer (2004); D = DIRECT SCORING (from 1 – almost never to 5 – almost always), R = REVERSE SCORING (from 5 – almost never to 1 – almost always).

| Nr. | Scoring | Item content                                                                    |
|-----|---------|---------------------------------------------------------------------------------|
| I1  | R       | I am clear about my feelings.                                                   |
| I2  | R       | I pay attention to how I feel.                                                  |
| I3  | D       | I experience my emotions as overwhelming and out of control.                    |
| I4  | D       | I have no idea how I am feeling.                                                |
| I5  | D       | I have difficulty making sense out of my feelings.                              |
| I6  | R       | I am attentive to my feelings.                                                  |
| I7  | R       | I know exactly how I am feeling.                                                |
| I8  | R       | I care about what I am feeling.                                                 |
| I9  | D       | I am confused about how I feel.                                                 |
| I10 | D       | When I'm upset, I acknowledge my emotions.                                      |
| I11 | D       | When I'm upset, I become angry with myself for feeling that way.                |
| I12 | D       | When I'm upset, I become embarrassed for feeling that way                       |
| I13 | D       | When I'm upset, I have difficulty getting work done                             |
| I14 | D       | When I'm upset, I become out of control.                                        |
| I15 | D       | When I'm upset, I believe that I will remain that way for a long time.          |
| I16 | D       | When I'm upset, I believe that I will end up feeling very depressed.            |
| I17 | R       | When I'm upset, I believe that my feelings are valid and important.             |
| I18 | D       | When I'm upset, I have difficulty focusing on other things.                     |
| I19 | D       | When I'm upset, I feel out of control.                                          |
| I20 | R       | When I'm upset, I can still get things done.                                    |
| I21 | D       | When I'm upset, I feel ashamed at myself for feeling that way.                  |
| I22 | R       | When I'm upset, I know that I can find a way to eventually feel better.         |
| I23 | D       | When I'm upset, I feel like I am weak.                                          |
| I24 | R       | When I'm upset, I feel like I can remain in control of my behaviors             |
| I25 | D       | When I'm upset, I feel guilty for feeling that way.                             |
| I26 | D       | When I'm upset, I have difficulty concentrating.                                |
| I27 | D       | When I'm upset, I have difficulty controlling my behaviors.                     |
| I28 | D       | When I'm upset, I believe there is nothing I can do to make myself feel better. |
| I29 | D       | When I'm upset, I become irritated at myself for feeling that way.              |
| I30 | D       | When I'm upset, I start to feel very bad about myself.                          |
| I31 | D       | When I'm upset, I believe that wallowing in it is all I can do.                 |
| I32 | D       | When I'm upset, I lose control over my behavior.                                |
| I33 | D       | When I'm upset, I have difficulty thinking about anything else.                 |
| I34 | R       | When I'm upset I take time to figure out what I'm really feeling.               |
| I35 | D       | When I'm upset, it takes me a long time to feel better.                         |
| I36 | D       | When I'm upset, my emotions feel overwhelming.                                  |
